# Supplementary material for: Genomic screening of 16 UK native bat species through conservationist networks uncovers coronaviruses with zoonotic potential
Source: PubMed Central journal article supplement (PMC10300128; doi:10.1038/s41467-023-38717-w), 2023-06-27
Supplement: 41467_2023_38717_MOESM1_ESM.pdf [file 41467_2023_38717_MOESM1_ESM.pdf]

1 **Supplementary Information: Genomic screening of 16 UK native bat**  
2 **species through conservationist networks uncovers coronaviruses**  
3 **with zoonotic potential**

4 Tan et al.

5  
6 *Existing RT-PCR assays underestimate coronavirus prevalence in bats*

7 Given that RT-PCR has conventionally been used to screen for coronaviruses in bats,  
8 we sought to determine if the novel coronavirus genomes we recovered from our  
9 metatranscriptomes could have been detected using published pan-coronavirus  
10 primers. Using BLASTn searches, we aligned the external RT-PCR primers that have  
11 been described previously<sup>1-5</sup> against all coronavirus genomes in our custom database  
12 and our nine novel genomes. These include primers that have been used widely<sup>1,3,4</sup>,  
13 and updated primers described in two more recent studies<sup>2,5</sup>. Amongst these primers,  
14 the ones designed by Holbrook et al.<sup>5</sup> are an updated version of those by Watanabe  
15 et al.<sup>3</sup>. Notably, whether a primer can bind to a particular genomic sequence is difficult  
16 to predict *in vitro* since the impact of mismatches on primer binding can depend on  
17 various factors such as the position of the mismatch or annealing temperature<sup>6-8</sup>. We  
18 therefore assumed that a primer sequence can bind to a coronavirus genome if a  
19 primer-genome alignment could be produced by BLASTn, and conversely, that a  
20 primer sequence is not likely to bind if no primer-genome alignment could be identified.  
21 Under this assumption, the coronavirus diversity that can be 'detected' by each primer  
22 set can be estimated by the proportion of coronavirus genomes that could be aligned  
23 to a query primer sequence. Since most of these primers contained degenerate bases,  
24 we performed the BLASTn analysis on every combination of non-degenerate bases  
25 for each primer and retained only the primer-genome alignment with the lowest  
26 number of mismatches.

27  
28 None of the external primer sets, except that by Vijgen et al.<sup>4</sup>, were able to detect all  
29 nine novel genomes (Supplementary Figure 1a). In fact, three of the external primer  
30 sets<sup>1-3</sup> could detect at most one of the novel coronaviruses. We extended this analysis  
31 further by analysing the sequence homology of all external primer sets to all genomes  
32 in our custom coronavirus database. All external primer sets carried at least one

33 mismatch or had no detectable homology to at least one coronavirus genome in our  
34 database, indicating that none are likely to capture the full existing diversity of  
35 coronaviruses (Supplementary Figure 1b). Strikingly, the proportion of coronavirus  
36 genomes that could be detected by any external primer set, estimated from the  
37 number of detectable primer-genome alignments, ranged from 9.5 to 93.5%. Given  
38 that our analysis only includes the external primers, additional mismatches in the  
39 internal primer set may exacerbate the poor sensitivity of these RT-PCR assays.  
40 Overall, these findings indicate that RT-PCR screens that employ these primers likely  
41 underestimate viral prevalence in the systems being studied.

42

#### 43 *Genome structure analyses indicate the presence of novel genes*

44 We used various bioinformatic tools (see Methods) to determine if these genomes  
45 carry any novel genes. No notable novel genes were identified in the sarbecoviruses,  
46 which like RhGB01 have a similar genome structure to SARS-CoV-2 and SARS-CoV  
47 but are missing ORF8<sup>9</sup> (Supplementary Figure 5). Although RfGB02 has an out of  
48 frame deletion that likely results in a truncated ORF7a. Similarly PpiGB02, MdGB02  
49 and MdGB03 had similar genome structures to other bat Pedacoviruses, potentially  
50 expressing an additional ORF7 relative to PEDV<sup>10</sup>. The pedacovirus MdGB01 does  
51 however contain an additional potential ORF8 at the 3' end of the genome, which is  
52 absent in the other UK bat pedacoviruses. This potential ORF8 has an upstream  
53 putative transcriptional regulatory sequence (TRS) and would result in expression of  
54 a 56 amino acid (a.a.) protein. However, PaGB01 encodes a novel 100 a.a protein  
55 that is only 54.9% similar to its closest homologue, the ORF3 accessory protein in  
56 MERS-CoV. This putative ORF3-like protein could not be assigned to any InterPro  
57 protein families<sup>11</sup>, but was predicted to contain a transmembrane and an extracellular  
58 domain. PaGB01 also encodes a 218 a.a. protein at 73.3% identity to the MERS-CoV  
59 ORF5 protein. Finally PaGB01 also encodes an ORF predicted to express an 83 a.a.  
60 protein, partially overlapping (in the +1 reading frame) with its N gene at the 3' end of  
61 its genome. Consistent with coronavirus gene naming conventions, this would be  
62 named ORF8c. The divergence of these novel proteins from MERS-CoV are largely  
63 in line with that between the accessory proteins in MERS-CoV and other bat-borne  
64 MERS-CoV-related species, btCoV-HKU4 and btCoV-HKU5<sup>12</sup>. This indicates that the  
65 novel proteins may possess functions similar to the MERS-CoV accessory proteins.

66

67 Accessory proteins are non-essential for coronavirus replication *in vitro*, but are  
68 thought to play key roles in host-virus interactions. For example, ORF3 and ORF5  
69 proteins in MERS-CoV have been shown to induce apoptosis<sup>13</sup> and also to antagonise  
70 interferon responses<sup>14</sup>, which are a key aspect of the innate immune response to  
71 viruses in humans. The accessory genes of coronaviruses are highly variable in  
72 number and function across the family *Coronaviridae*. However, MERS-CoV and its  
73 close bat-borne relatives, btCoV-HKU4 and btCoV-HKU5, share a similar number of  
74 accessory genes with similar functions, despite low protein sequence similarities  
75 between the accessory proteins from these species<sup>12,15</sup>. In light of this, further  
76 characterisation of the novel proteins identified in PaGB01 may reveal fundamental  
77 insights on the evolution of viral pathogenicity. For example, if the accessory genes of  
78 PaGB01 match the function of the MERS-CoV equivalent proteins in interacting with  
79 human cellular signalling pathways, that could suggest that immunoregulation is a  
80 conserved function amongst MERS-CoV-related coronaviruses and may help explain  
81 how MERS-CoV is able to cause human disease. Conversely, a lack of shared activity  
82 may indicate that these functions are unique to MERS-CoV and its closest relatives  
83 and are not universally found in other sister lineages, perhaps explaining why there is  
84 no evidence of other MERS-related virus infections in humans to date.

85

### 86 *High prevalence of recombination amongst sarbecoviruses*

87 Given that further adaptations are necessary for the zoonotic emergence of RhGB01-  
88 like viruses, we asked if genetic recombination may speed up this process.  
89 Recombination in viruses allows the genetic transfer of large sections of the genome  
90 in a single event, helping them sample the genomic sequence space at a more rapid  
91 pace when compared to the accumulation of point mutations alone<sup>16</sup>. In fact several  
92 regions in the spike protein of coronaviruses that influence host range have been  
93 suggested to have been acquired through recombination<sup>17</sup>, which implies that  
94 recombination may be an important driver for zoonotic emergence. As such, we  
95 performed recombination analyses for sarbecoviruses, including our novel sequences,  
96 using the recombination detection program (RDP)<sup>18</sup>. This tool comprises a suite of  
97 algorithms for recombination detection and has been used previously for  
98 sarbecoviruses<sup>19,20</sup>. We searched for recombination amongst 218 representative

99 sarbecovirus genomes using all nine algorithms implemented within RDP4 (RDP<sup>21</sup>,  
100 GENECONV<sup>22</sup>, BOOTSCAN<sup>23</sup>, MaxChi<sup>24</sup>, Chimaera<sup>25</sup>, SisScan<sup>26</sup>, PhyIPro<sup>27</sup>, LARD<sup>28</sup>  
101 and 3SEQ<sup>29</sup>), retaining predicted breakpoints supported by at least six of these  
102 methods. Using this approach, we detected 202 putative recombination events  
103 amongst the sarbecoviruses considered, suggesting a high prevalence of  
104 recombination within the subgenus. Additionally, we detect an overrepresentation of  
105 recombination signals near the N-terminal half of the spike protein (Supplementary  
106 Figure 11a), which also contains the receptor binding domain that is the primary  
107 determinant of host receptor usage. We also identified six recombination events within  
108 the RhGB01-like viruses supported by 2-6 detection algorithms (Supplementary  
109 Figure 11b), demonstrating the potential for recombination involving the novel UK  
110 sarbecoviruses. Overall, these results support frequent events of recombination in  
111 sarbecoviruses, which may increase the likelihood of novel sarbecoviruses, some  
112 which may be zoonotic, emerging in *Rhinolophus* bats in the UK.

113 **Supplementary Figures**

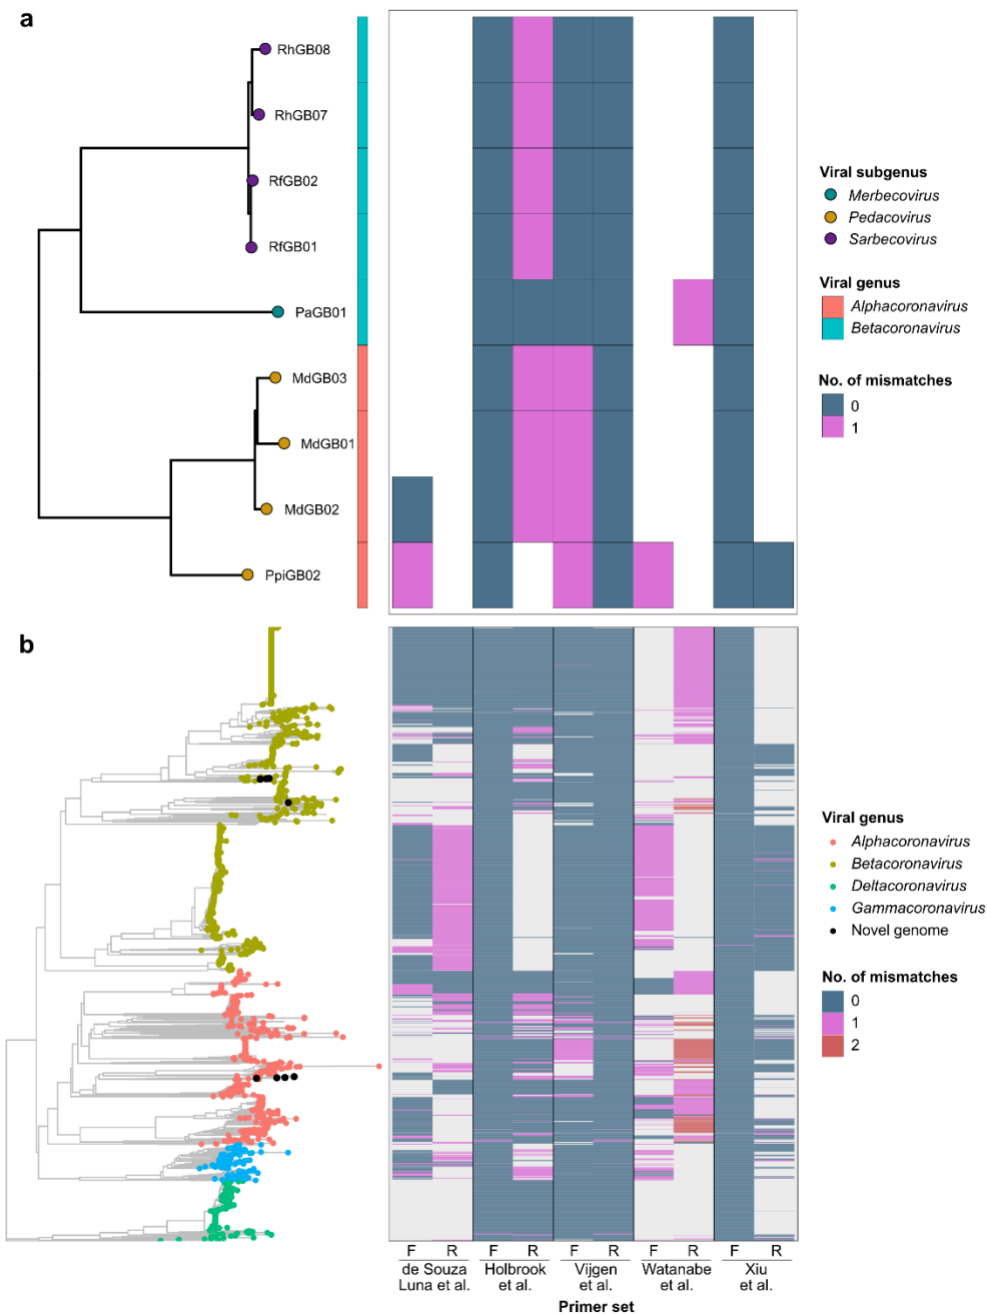

114

115 **Supplementary Figure 1. RT-PCR assays underestimate coronavirus**  
 116 **prevalence.** Heatmap summarising the number of mismatches of the forward (F) and  
 117 reverse (R) degenerate primers described in previous studies to (a) novel genomes,  
 118 and (b) to the nine novel and 2118 genomes in our custom coronavirus database. Both  
 119 heatmaps are matched to the tips of the alignment-free trees generated from the  
 120 genomes analysed, which are similar to that shown in Fig. 1a but represented as a  
 121 linear phylogram. Heatmap cells coloured white or gray indicate no detectable  
 122 homology between a degenerate primer and a genome by BLASTn.

123

a

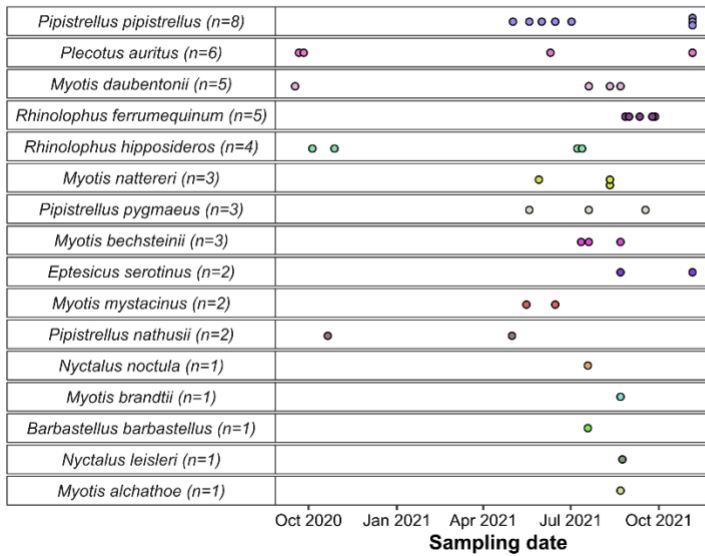

b

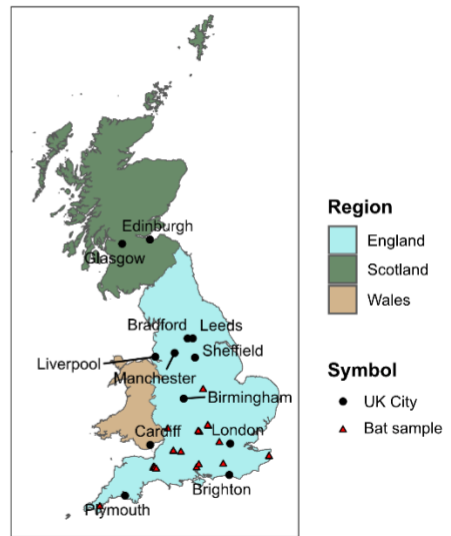

124

125

126

127

128

129

**Supplementary Figure 2. Collection of faecal samples from 16 UK bat species through extensive network of bat rehabilitators.** (a) Temporal distribution of samples collected with the number of samples per host species annotated. (b) Geographical distribution of samples collected relative to the major cities in the UK.

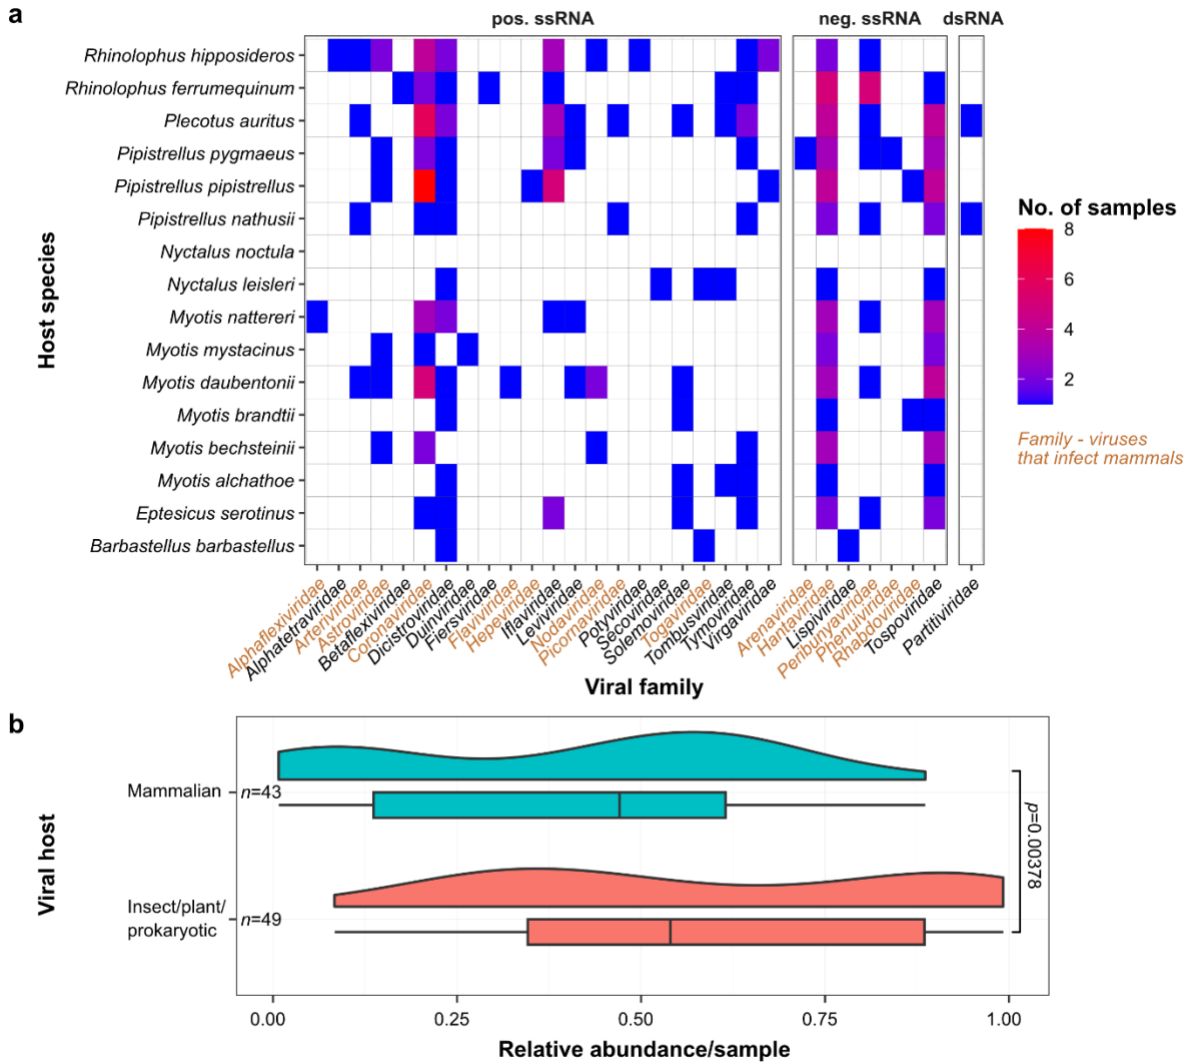

130

131 **Supplementary Figure 3. Analysis of the UK bat faecal virome.** (a) Heatmap  
 132 summarizing the number of samples per UK bat species where a particular viral family  
 133 was present, based on Kraken2 taxonomic assignment of reads. Viral families that are  
 134 known to infect mammals are highlighted in brown. (b) The total relative abundance of  
 135 mammalian or non-mammalian viral species in each sample. Data are visualized with  
 136 both Gaussian kernel probability density and box-and-whisker plots (centre line,  
 137 median; box limits, upper and lower quartiles; whiskers, 1.5x interquartile range). A  
 138 two-sided Mann-Whitney U test was used to test if the two distributions differed.

139

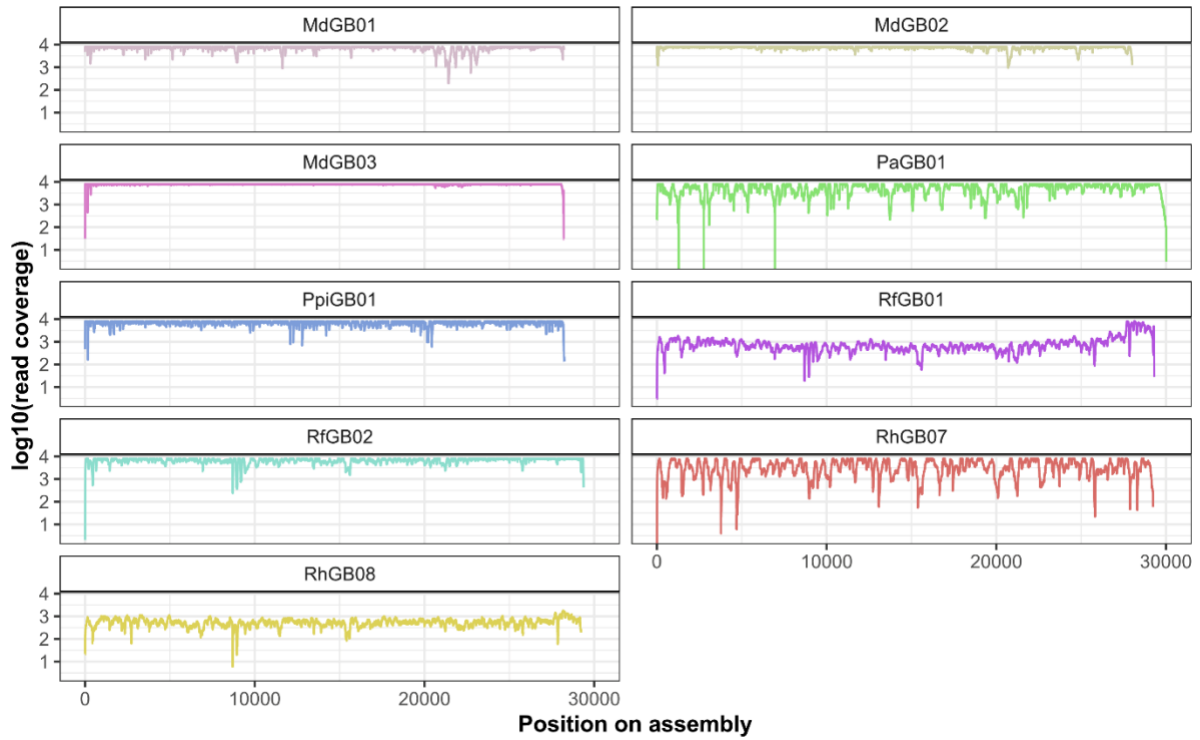

140

141 **Supplementary Figure 4. Even read coverage across all complete genomes**  
 142 **recovered from UK bats.** Sequencing reads were mapped back to the final genomes  
 143 using Bowtie2 and per-position read coverage was calculated using Samtools.  
 144



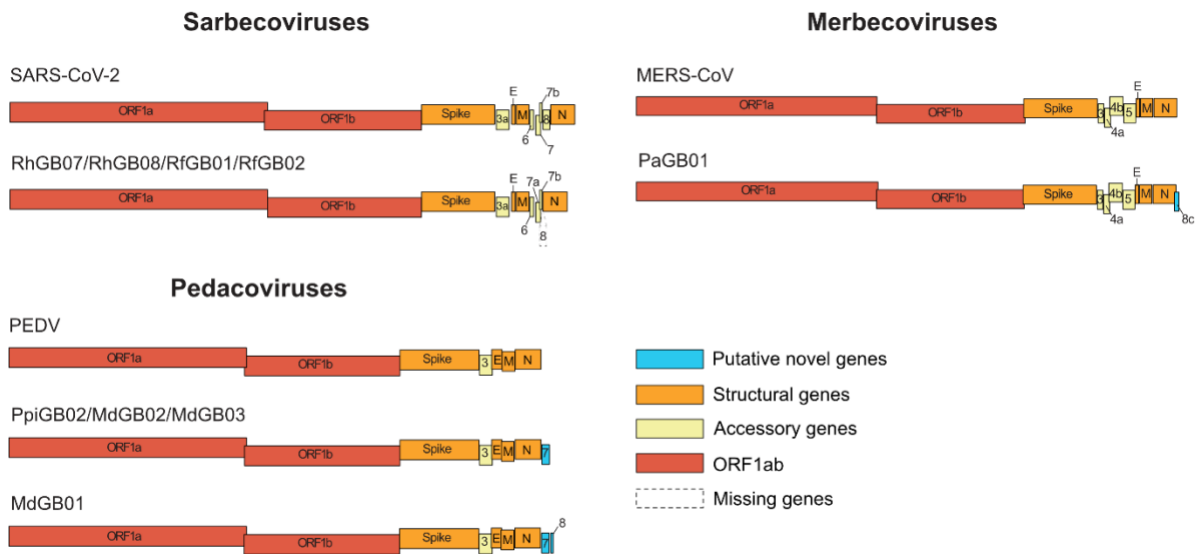

146

147

148

149

150

151

152

153

154

155

**Supplementary Figure 5. Genome schematics of the novel UK bat coronaviruses.** To-scale layouts of ORFs within the novel bat coronaviruses from this study compared to prototypic genomes from the same subgenera. ORF1ab polyproteins are shown in red, structural proteins in orange, accessory proteins in yellow, and putative novel ORFs in blue. Missing ORFs relative to the prototypes shown by dotted lines. Standard coronavirus gene nomenclature was used throughout. This figure was made using Adobe Illustrator v27.1.1 and Geneious v11.1.5 (<https://www.geneious.com>).

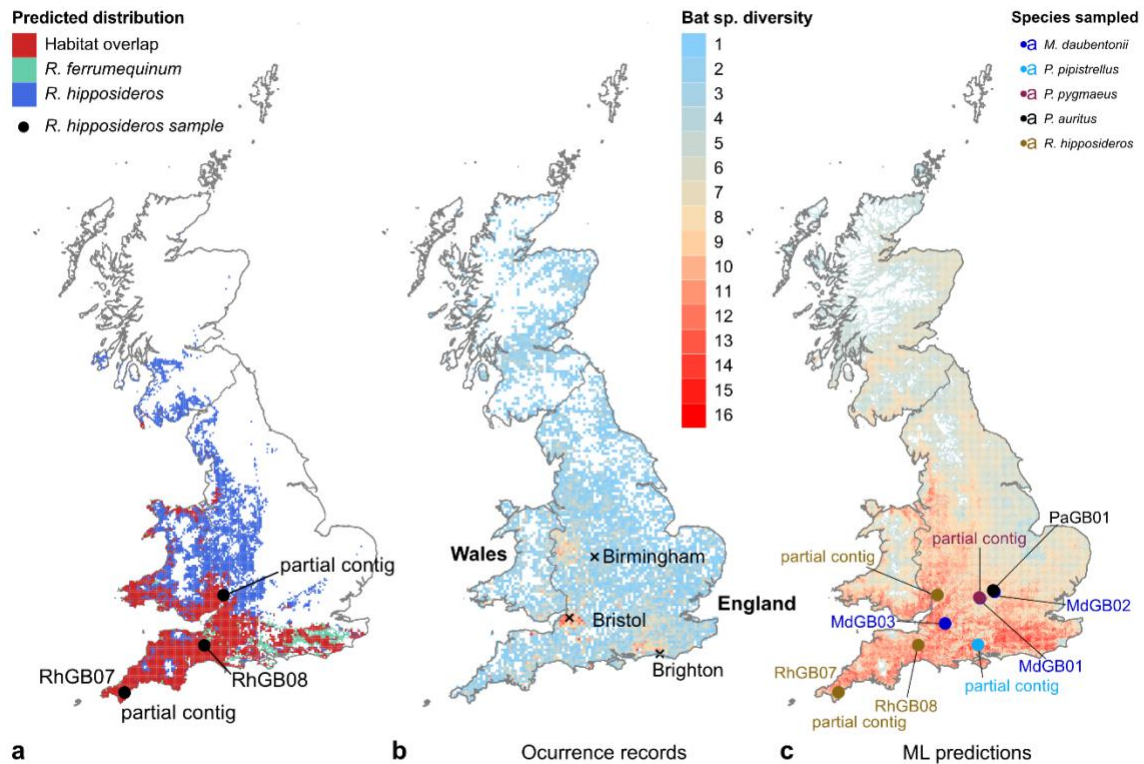

156

157

158

159

160

161

162

163

164

165

166

167

**Supplementary Figure 6. Species distribution maps of UK bats.** (a) Predicted distributions of *R. ferrumequinum* and *R. hipposideros* species in the UK. (b) Species diversity (i.e., number of species) found within a 5x5 km square grid computed based on occurrence records dating from 2000-present. (c) Predicted species diversity all 17 UK breeding bat species found within a 1x1 km square grid. All predicted distributions were generated by our ensemble machine learning model. Species were deemed to be present if the predicted probability score (i.e., habitat suitability) generated for any square grid exceeds 0.8. *Rhinolophus* samples and all UK bat samples where coronavirus genomes or partial contigs were recovered, and whose exact geographical coordinates were available are annotated in (a) and (c), respectively.

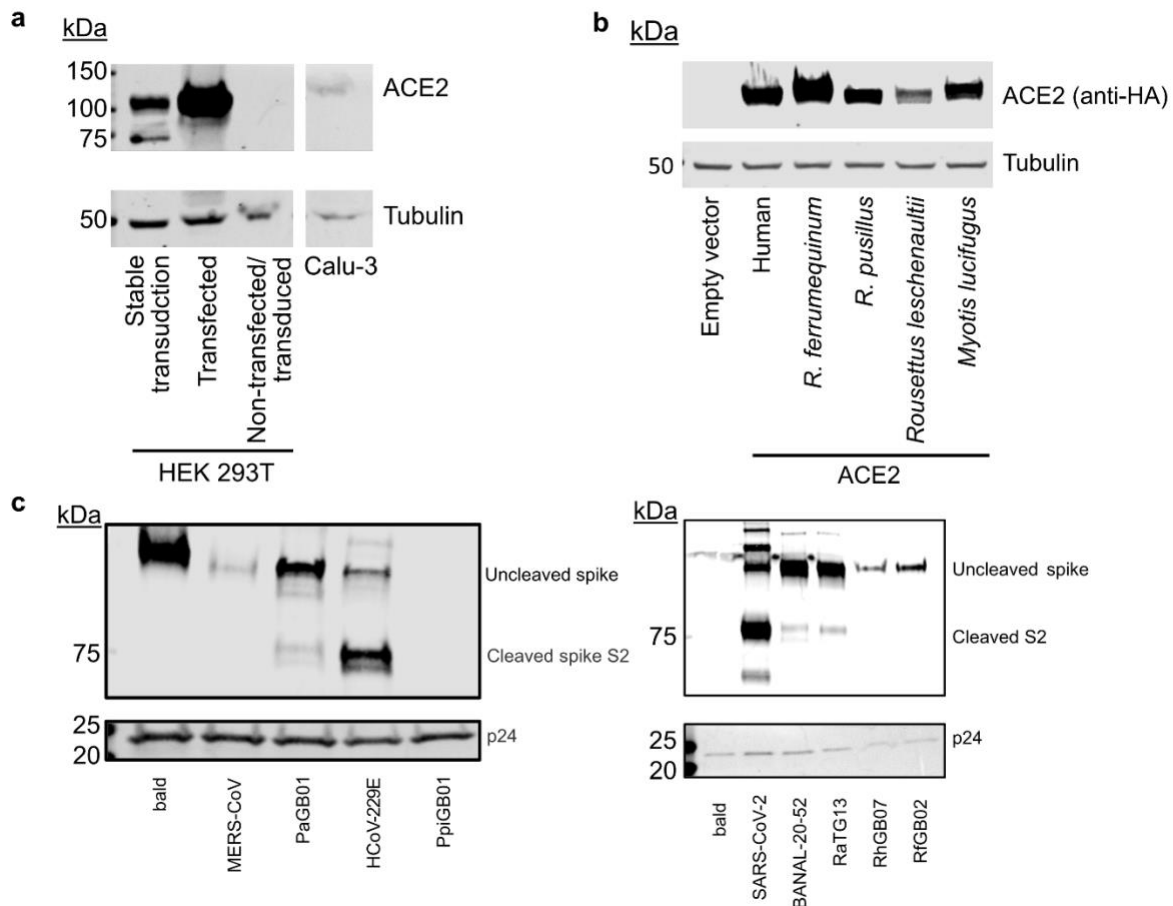

168  
 169 **Supplementary Figure 7. Western blot analyses of spike pseudoviruses and cell**  
 170 **receptor expression.** (a) Western blot showing relative ACE2 expressions of stably  
 171 transduced, transfected or non-transfected/transduced HEK293T. (b) Western blot  
 172 analysis of HEK293T cells transfected with different ACE2 constructs. All ACE2  
 173 proteins tagged with C-terminal HA tag. Equal loading shown by probing with anti-  
 174 tubulin antibody. (c) Western blot analysis of concentrated pseudovirus expressing  
 175 different sarbecovirus, merbecovirus and pedacovirus spike proteins. Sarbecovirus  
 176 spike expression (upper panel) determined by a pan-sarbecovirus anti-S2 antibody.  
 177 Pedacovirus and merbecovirus spike expression determined by incorporation of C-  
 178 terminally Myc-tagged spike (lower panel). The upper band corresponds to uncleaved,  
 179 full length spike, the lower band to the cleaved S2 fragment. Loading shown by p24  
 180 lentiviral capsid protein. All western blots shown are representative repeats of n=3  
 181 independent experiments performed.  
 182

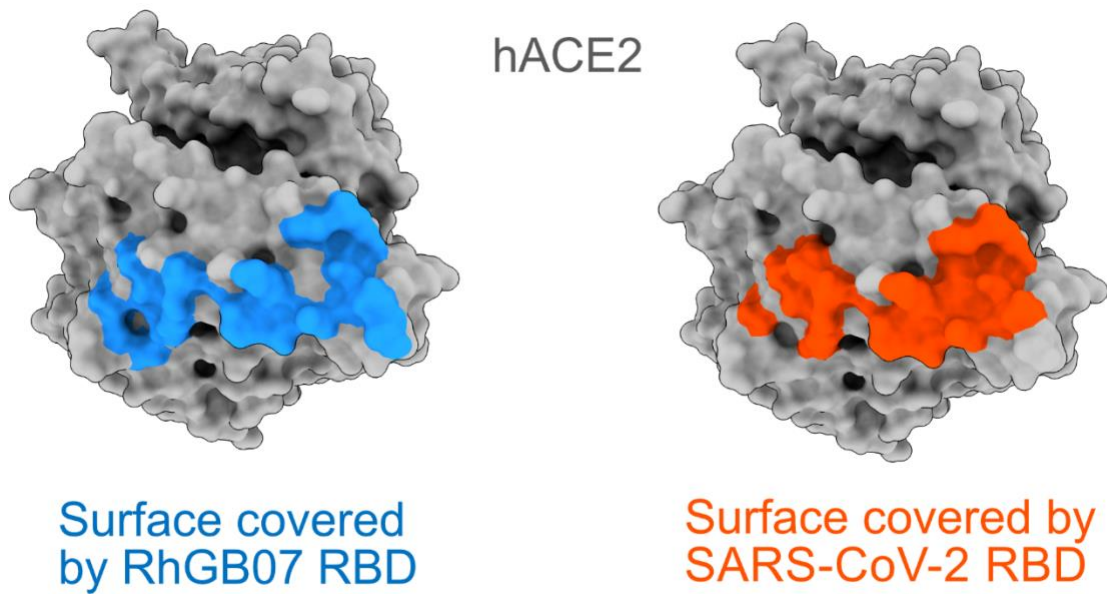

183

184 **Supplementary Figure 8. Protein surfaces of hACE2 in contact with RhGB07 or**  
185 **SARS-CoV-2 receptor-binding domain (RBD).** The structure of hACE2 is shown in  
186 grey and the surface in contact with the RBDs of RhGB07 (blue) and SARS-CoV-2  
187 (orange) are highlighted. We computed the surface area of hACE2 in contact with either  
188 RhGB07 or SARS-CoV-2 RBD using the *buriedarea* command in *ChimeraX*.

189

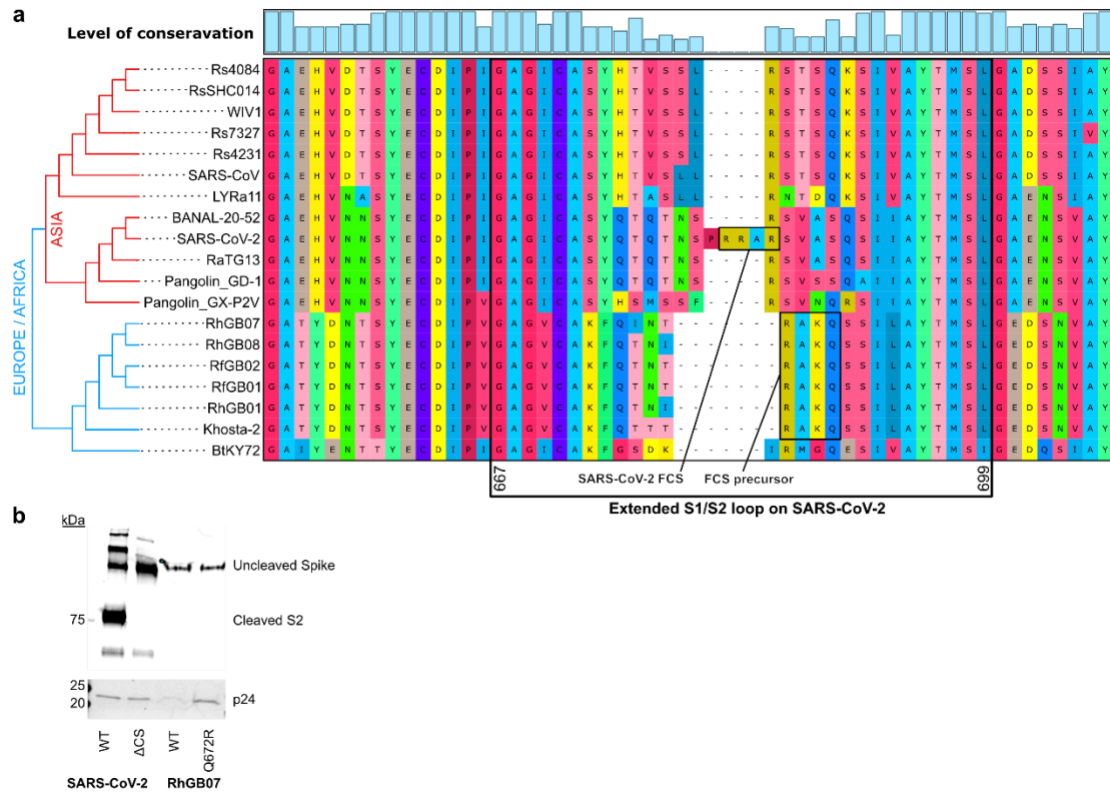

190

191 **Supplementary Figure 9. European sarbecoviruses possess an RAKQ motif**  
 192 **resembling a furin cleavage site.** (a) Sequence alignment of sarbecovirus spike  
 193 genes at the region surrounding the SARS-CoV-2 furin cleavage site (FCS) and R-A-  
 194 K-Q furin cleavage site precursor in UK sarbecoviruses. Sequence alignment was  
 195 visualized using UGENE v42.0. The alignment region comprising SARS-CoV-2 spike  
 196 residue positions 667-699 is indicated by a black rectangle and corresponds to the  
 197 extended S1/S2 loop containing the R-R-A-R FCS present in SARS-CoV-2. Barchart  
 198 showing the proportion of genomes with residues identical to SARS-CoV-2 at each  
 199 position (top). Maximum-likelihood tree identical to that shown in Fig. 3c (left) showing  
 200 the genetic relatedness of Asian, European and African sarbecoviruses. (b) Western  
 201 blot of RhGB07 spike with or without the Q672R mutation (generating an RAKR motif).  
 202 SARS-CoV-2 spike with or without the 678-NSPRRARS-687 deletion were used as  
 203 negative and positive controls, respectively.

204

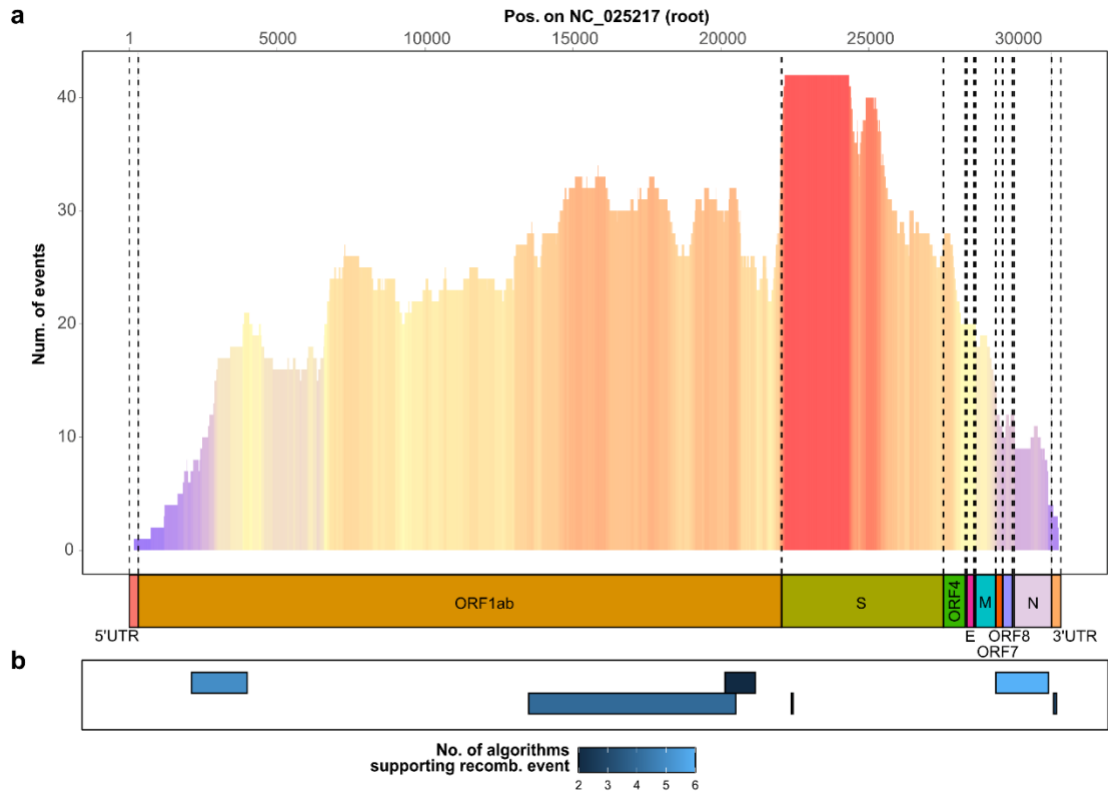

205

206 **Supplementary Figure 10. High prevalence of recombination amongst**  
 207 **sarbecoviruses.** (a) Distribution of recombination events detected by at least six of  
 208 the nine recombination detection algorithms in RDP4. This analysis was performed on  
 209 an alignment of 218 representative sarbecoviruses, including RhGB01 and our four  
 210 novel sarbecoviruses (RhGB07, RhGB08, RfGB01, RfGB02), using NC\_025217 as  
 211 the reference. (b) All recombination events involving RhGB01-like viruses either as  
 212 donor or recipients. Recombination events were supported by 2-6 detection  
 213 algorithms.

214

215  
216  
217  
218  
219  
220  
221  
222  
223

(ATTACHED AS SEPARATE PDF)

**Supplementary Figure 11. Species distribution modelling for the 17 UK breeding bat species.** (Left) Performance of individual machine-learning algorithms in predicting species distributions. (Right) Maps of individual species distributions. Predicted probability scores indicate the predicted habitat suitability for each 1x1km square grid, which ranges from 0 (unsuitable habitat) to 1 (suitable habitat). The number of occurrence records for each bat species used to train the models, and the geographical locations of bat samples collected in this study are indicated.

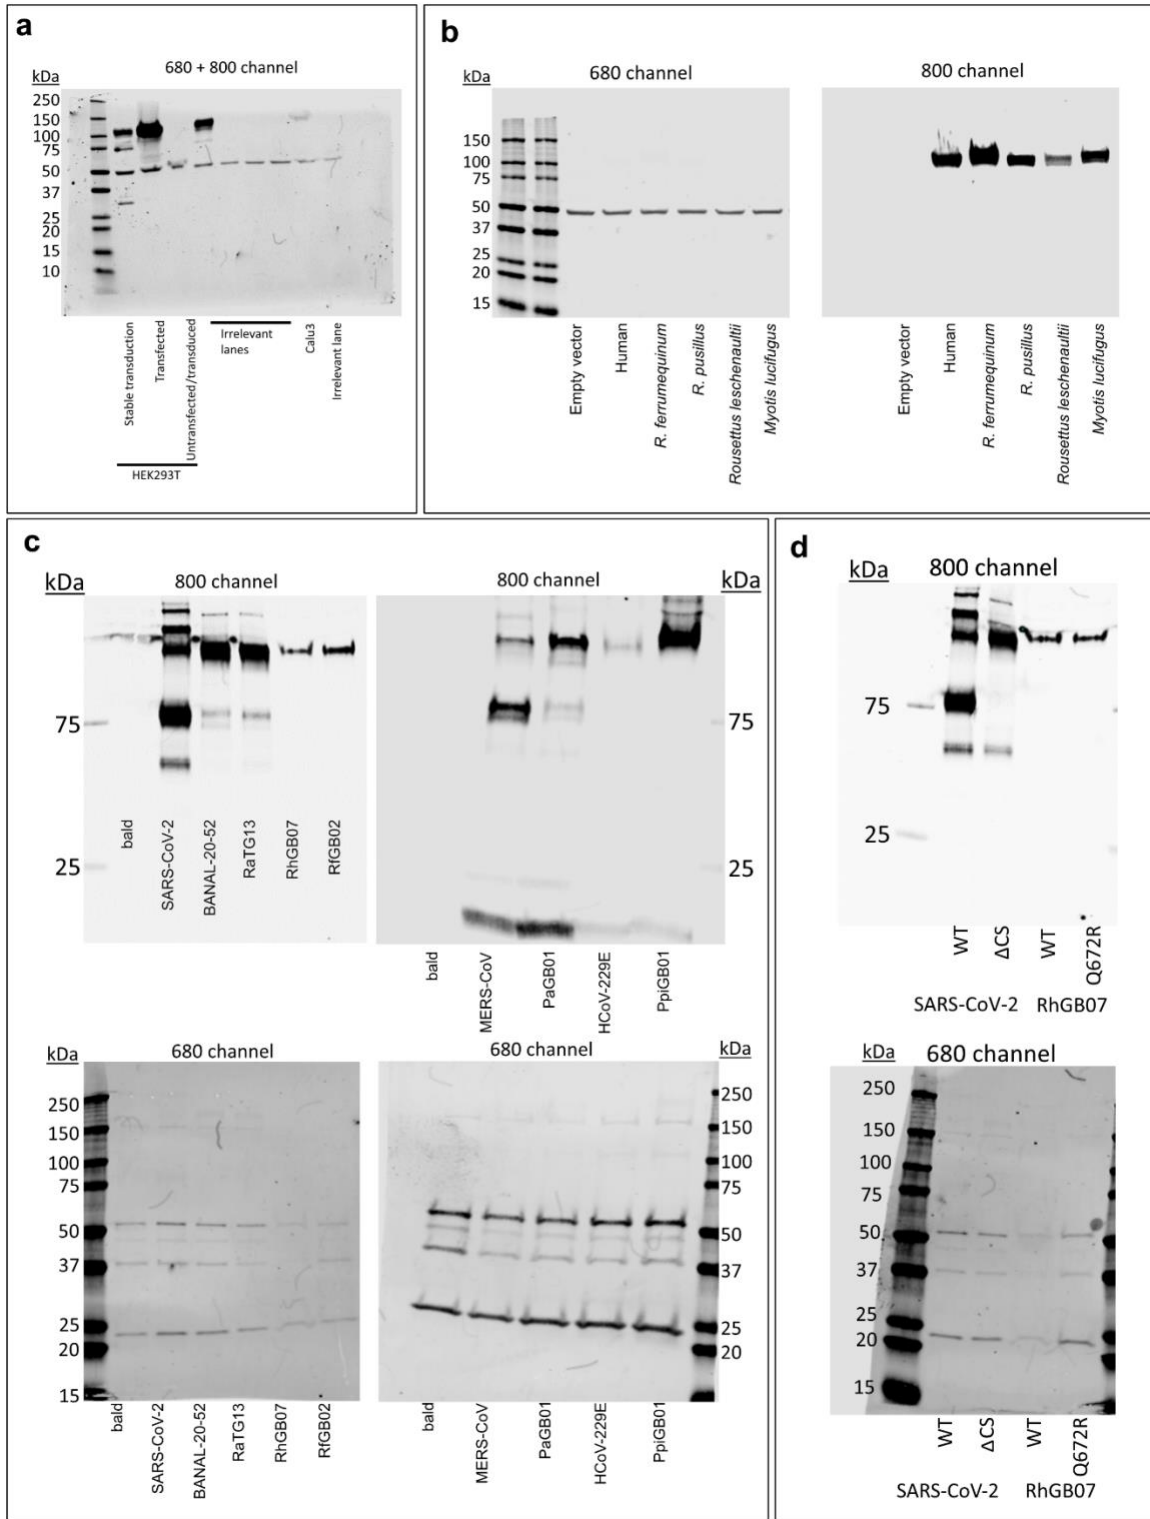

224

225 **Supplementary Figure 12. Raw uncropped images of western blots.** Panels (a),  
 226 (b), (c) and (d) correspond to the images shown in Supplementary Fig. 7a, 7b, 7c and  
 227 9b, respectively.

228

229

230



231 **References**

- 232 1. De Souza Luna, L. K. *et al.* Generic Detection of Coronaviruses and Differentiation  
233 at the Prototype Strain Level by Reverse Transcription-PCR and Nonfluorescent  
234 Low-Density Microarray. *J. Clin. Microbiol.* **45**, 1049 (2007).
- 235 2. Xiu, L. *et al.* A RT-PCR assay for the detection of coronaviruses from four genera.  
236 *J. Clin. Virol.* **128**, 104391 (2020).
- 237 3. Watanabe, S. *et al.* Bat coronaviruses and experimental infection of bats, the  
238 Philippines. *Emerg. Infect. Dis.* **16**, 1217 (2010).
- 239 4. Vijgen, L., Moës, E., Keyaerts, E., Li, S. & Ranst, M. V. A pancoronavirus RT-PCR  
240 assay for detection of all known coronaviruses. in *SARS-and Other Coronaviruses*  
241 3–12 (Springer, 2008).
- 242 5. Holbrook, M. G. *et al.* Updated and validated pan-coronavirus PCR assay to detect  
243 all coronavirus genera. *Viruses* **13**, 599 (2021).
- 244 6. Ye, J. *et al.* Primer-BLAST: A tool to design target-specific primers for polymerase  
245 chain reaction. *BMC Bioinformatics* **13**, 134 (2012).
- 246 7. Waterfall, C. M., Eisenthal, R. & Cobb, B. D. Kinetic characterisation of primer  
247 mismatches in allele-specific PCR: a quantitative assessment. *Biochem. Biophys.*  
248 *Res. Commun.* **299**, 715–722 (2002).
- 249 8. Whiley, D. M. & Sloots, T. P. Sequence variation in primer targets affects the  
250 accuracy of viral quantitative PCR. *J. Clin. Virol.* **34**, 104–107 (2005).
- 251 9. Crook, J. M. *et al.* Metagenomic identification of a new sarbecovirus from  
252 horseshoe bats in Europe. *Sci. Rep.* **11**, 1–9 (2021).
- 253 10. Lo, V. T., Yoon, S. W., Choi, Y. G., Jeong, D. G. & Kim, H. K. Genomic  
254 Comparisons of Alphacoronaviruses and Betacoronaviruses from Korean Bats.  
255 *Viruses* **14**, 1389 (2022).

- 256 11. Blum, M. *et al.* The InterPro protein families and domains database: 20 years on.  
257 *Nucleic Acids Res.* **49**, D344–D354 (2021).
- 258 12. Matthews, K. L., Coleman, C. M., van der Meer, Y., Snijder, E. J. & Frieman, M. B.  
259 The ORF4b-encoded accessory proteins of Middle East respiratory syndrome  
260 coronavirus and two related bat coronaviruses localize to the nucleus and inhibit  
261 innate immune signalling. *J. Gen. Virol.* **95**, 874 (2014).
- 262 13. Zhou, Y. *et al.* Host E3 ligase HUWE1 attenuates the proapoptotic activity of the  
263 MERS-CoV accessory protein ORF3 by promoting its ubiquitin-dependent  
264 degradation. *J. Biol. Chem.* **298**, (2022).
- 265 14. Yang, Y. *et al.* The structural and accessory proteins M, ORF 4a, ORF 4b, and  
266 ORF 5 of Middle East respiratory syndrome coronavirus (MERS-CoV) are potent  
267 interferon antagonists. *Protein Cell* **4**, 951–961 (2013).
- 268 15. Woo, P. C., Lau, S. K., Li, K. S., Tsang, A. K. & Yuen, K.-Y. Genetic relatedness  
269 of the novel human group C betacoronavirus to Tylonycteris bat coronavirus HKU4  
270 and Pipistrellus bat coronavirus HKU5. *Emerg. Microbes Infect.* **1**, 1–5 (2012).
- 271 16. Simon-Loriere, E. & Holmes, E. C. Why do RNA viruses recombine? *Nat. Rev.*  
272 *Microbiol.* **9**, 617–626 (2011).
- 273 17. Graham, R. L. & Baric, R. S. Recombination, reservoirs, and the modular spike:  
274 mechanisms of coronavirus cross-species transmission. *J. Virol.* **84**, 3134–3146  
275 (2010).
- 276 18. Martin, D. P., Murrell, B., Golden, M., Khoosal, A. & Muhire, B. RDP4: Detection  
277 and analysis of recombination patterns in virus genomes. *Virus Evol.* **1**, (2015).
- 278 19. Boni, M. F. *et al.* Evolutionary origins of the SARS-CoV-2 sarbecovirus lineage  
279 responsible for the COVID-19 pandemic. *Nat. Microbiol.* **5**, 1408–1417 (2020).

- 280 20. Lytras, S. *et al.* Exploring the natural origins of SARS-CoV-2 in the light of  
281 recombination. *Genome Biol. Evol.* **14**, evac018 (2022).
- 282 21. Martin, D. & Rybicki, E. RDP: detection of recombination amongst aligned  
283 sequences. *Bioinformatics* **16**, 562–563 (2000).
- 284 22. Padidam, M., Sawyer, S. & Fauquet, C. M. Possible emergence of new  
285 geminiviruses by frequent recombination. *Virology* **265**, 218–225 (1999).
- 286 23. Salminen, M. O., Carr, J. K., Burke, D. S. & McCUTCHAN, F. E. Identification of  
287 breakpoints in intergenotypic recombinants of HIV type 1 by bootscanning. *AIDS*  
288 *Res. Hum. Retroviruses* **11**, 1423–1425 (1995).
- 289 24. Smith, J. M. Analyzing the mosaic structure of genes. *J. Mol. Evol.* **34**, 126–129  
290 (1992).
- 291 25. Posada, D. & Crandall, K. A. Evaluation of methods for detecting recombination  
292 from DNA sequences: computer simulations. *Proc. Natl. Acad. Sci.* **98**, 13757–  
293 13762 (2001).
- 294 26. Gibbs, M. J., Armstrong, J. S. & Gibbs, A. J. Sister-scanning: a Monte Carlo  
295 procedure for assessing signals in recombinant sequences. *Bioinformatics* **16**,  
296 573–582 (2000).
- 297 27. Weiller, G. F. Phylogenetic profiles: a graphical method for detecting genetic  
298 recombinations in homologous sequences. *Mol. Biol. Evol.* **15**, 326–335 (1998).
- 299 28. Holmes, E. C., Worobey, M. & Rambaut, A. Phylogenetic evidence for  
300 recombination in dengue virus. *Mol. Biol. Evol.* **16**, 405–409 (1999).
- 301 29. Boni, M. F., Posada, D. & Feldman, M. W. An exact nonparametric method for  
302 inferring mosaic structure in sequence triplets. *Genetics* **176**, 1035–1047 (2007).
- 303  
304
