# Supplementary material for: Genomic screening of 16 UK native bat species through conservationist networks uncovers coronaviruses with zoonotic potential
Source: PubMed Central journal article supplement (PMC10300128; doi:10.1038/s41467-023-38717-w), 2023-06-27
Supplement: 41467_2023_38717_MOESM3_ESM.pdf [file 41467_2023_38717_MOESM3_ESM.pdf]

## **Description of Additional Supplementary Files**

File Name: Supplementary Data 1

Description: Summary of a selection of coronavirus surveillance studies in bats.

File Name: Supplementary Data 2

Description: Amino acid changes of RfGB02 from RhGB08.

File Name: Supplementary Data 3

Description: Metadata of all samples sequenced by deep RNA sequencing.

File Name: Supplementary Data 4

Description: Metadata of all 2118 coronavirus genomes from NCBI and GISAID used in this study.

File Name: Supplementary Data 5

Description: List of NBN Atlas datasets used in this study.

File Name: Supplementary Data 6

Description: GISAID acknowledgement table for GISAID genomes used in this study.
